# Supplementary material for: Nucleotide binding is the critical regulator of ABCG2 conformational transitions
Source: eLife. 2023 Feb 10;12:e83976. doi: 10.7554/eLife.83976 (PMC9917445; doi:10.7554/eLife.83976)
Supplement: Figure 2—source data 1. [file elife-83976-fig2-data1.xlsx]

## Sheet: Figure 2
Figure 2
panel A
		ABCG2-negative	ABCG2	ABCG2-GFP
					actin
