# Supplementary material for: Nucleotide binding is the critical regulator of ABCG2 conformational transitions
Source: eLife. 2023 Feb 10;12:e83976. doi: 10.7554/eLife.83976 (PMC9917445; doi:10.7554/eLife.83976)
Supplement: Figure 4—source data 1. [file elife-83976-fig4-data1.xlsx]

## Sheet: Figure 4
Figure 4
panel B : t1/2 of trapping reaction (min)
	Treatment	Untreated ATP/Mg2+ (vanadate)	Untreated ATP/Mg2+ (BeFx)		Quercetin ATP/Mg2+ (vanadate)	Quercetin ATP/Mg2+ (BeFx)		E3S ATP/Mg2+ (vanadate)	E3S ATP/Mg2+ (BeFx)		Untreated ADP/Mg2+ (vanadate)	Untreated ADP/Mg2+ (BeFx)		Quercetin ADP/Mg2+ (vanadate)	Quercetin ADP/Mg2+ (BeFx)		E3S ADP/Mg2+ (vanadate)	E3S ADP/Mg2+ (BeFx)
		2.52	2.31		0.1522	0.46		0.3045	0.8936		1.6317	1.2344		1.3342	1.2607		1.8449	1.3625
		2.6824	3.47		0.5532	0.71		0.5045	0.6312		1.402	1.4119		1.3742	1.5714		1.9647	1.2623
		2.9	1.9843		0.55	0.3658		0.5241	0.3133		1.8022	1.6914		1.6538	1.5639		1.5894	1.9318
		2.552	1.8429		0.5301	0.2456					1.7846	1.2655		1.6606
		3.0765	2.17		0.286						1.765	1.4479		1.7161
		2.3074	1.97		0.2818							1.785
		1.566	1.73
		2.038	1.6052
		2.3515	1.703
	Average	2.44376	2.08727		0.392217	0.44535		0.444367	0.6127		1.6771	1.47268		1.54778	1.46533		1.79967	1.51887
	SD	0.453487	0.565704		0.173727	0.197047		0.121524	0.290592		0.167835	0.230389		0.178918	0.177257		0.191695	0.361103
