# Supplementary material for: Nucleotide binding is the critical regulator of ABCG2 conformational transitions
Source: eLife. 2023 Feb 10;12:e83976. doi: 10.7554/eLife.83976 (PMC9917445; doi:10.7554/eLife.83976)
Supplement: Figure 5—source data 1. [file elife-83976-fig5-data1.xlsx]

## Sheet: Figure 5
Figure 5
panel B: t1/2 of 5D3 dissociation reaction (min)
		Untreated	E3S	Quercetin	ATP/Mg2+	ATP/Mg2+ + E3S	ATP/Mg2+ + Quercetin	AMP-PNP/Mg2+	AMP-PNP/Mg2+ + Quercetin	AMP-PNP/Mg2+ + E3S
		4.62	4.82	3.2105	1.701	0.9848	1.4795	2.2	2.4415	2.0314
		4.53	2.93	3.457	2.17	0.917	1.2734	2.95	2.032	1.8924
		4.64	3.62	3.2695	1.8385	0.602	0.7646	2.0598	2.15	1.9907
		5.3155		5.085	2.7375		0.5898	2.1992
		4.5392		3.3308	3.457		0.8927	3.2435
		6.0116			2.3901		1.4928	2.7054
		4.2085			2.1017			2.1
		5.0082			2.6345			2.7054
		5.6722
		4.9404
	Average	4.94856	3.79	3.67056	2.37879	0.8346	1.08213	2.52041	2.20783	1.9715
	SD	0.566235	0.956399	0.795957	0.56422	0.20427	0.385288	0.442492	0.210787	0.0714614
panel C: t1/2 of 5D3 dissociation reaction (min)
		Untreated	AMP-PNP/Mg2+	AMP-PNP/Mg2+ +E3S	AMP-PNP/Mg2+ + Quercetin
		4.62	2.2	1.29	1.0801
		4.53	2.95	1.17	0.9954
		4.64	2.0598	0.7892	0.9436
		5.3155	2.1992
		4.5392	3.2435
		6.0116	2.7054
		4.2085	2.1
		5.0082	2.7054
		5.6722
		4.9404
	Average	4.94856	2.52041	1.08307	1.00637
	SD	0.566235	0.442492	0.261473	0.0689076
