# Supplementary material for: Nucleotide binding is the critical regulator of ABCG2 conformational transitions
Source: eLife. 2023 Feb 10;12:e83976. doi: 10.7554/eLife.83976 (PMC9917445; doi:10.7554/eLife.83976)
Supplement: Figure 6—source data 1. [file elife-83976-fig6-data1.xlsx]

## Sheet: Figure 6
Figure 6									2020-01-30																	2020-02-04																	2020-06-26
panel B: Relative MX intracellular fluorescence intensity										MX intracellular fluorescence intensity	Relative MX intracellular fluorescence intensity			MX intracellular fluorescence intensity	Relative MX intracellular fluorescence intensity			MX intracellular fluorescence intensity	Relative MX intracellular fluorescence intensity			MX intracellular fluorescence intensity	Relative MX intracellular fluorescence intensity				MX intracellular fluorescence intensity	Relative MX intracellular fluorescence intensity			MX intracellular fluorescence intensity	Relative MX intracellular fluorescence intensity			MX intracellular fluorescence intensity	Relative MX intracellular fluorescence intensity			MX intracellular fluorescence intensity	Relative MX intracellular fluorescence intensity				MX intracellular fluorescence intensity	Relative MX intracellular fluorescence intensity			MX intracellular fluorescence intensity	Relative MX intracellular fluorescence intensity
			No pre-treatment	ATP depletion	Ko143	ATP depletion + Ko143	Vi		No pre-treatment	29.367	2.22305		ATP depletion	127.213	9.62988		Ko143	52.4639	3.97146		ATP depletion + Ko143	216.438	16.3841			No pre-treatment	118.626	1.05659		ATP depletion	3277.65	29.1937		Ko143	3218.09	28.6632		ATP_depletion +_Ko143	1219.21	10.8594			No pre-treatment	307.681	0.905473		ATP depletion	2992.77	8.80741
		2020-01-30	1	8.2076	25.5713	15.2049				12.0213	0.91			136.721	10.3496			43.7064	3.30853			218.961	16.5751				102.324	0.911385			2884.78	25.6944			3244.92	28.9022			1750.82	15.5944				311.996	0.918172			3303.15	9.72083
		2020-02-04	1	20.4012	17.905	15.9899				13.4831	1.02066			52.0973	3.94371			37.9778	2.87488			216.763	16.4087				51.2589	0.456558			3125.44	27.838			3663.81	32.6332			1532.36	13.6486				383.574	1.12882			2700.48	7.94723
		2020-06-26	1	6.9372	9.1159	11.2869	4.4691			12.3023	0.931271			126.847	9.60215			40.1651	3.04046			142.775	10.8079				81.316	0.724273			2394.72	21.3295			2581.88	22.9965			1949.3	17.3622				327.239	0.96303			3233.62	9.51621
		2020-07-03	1	11.323	10.8076		4.3636			16.8742	1.27736			44.0749	3.33642			934.22	70.7195			260.508	19.7202				212.698	1.89448			2505.08	22.3125			2982.31	26.5631			2855.64	25.4349				306.967	0.903372			2653.38	7.80862
		2020-07-17	1	22.5892	20.7982		2.9017			7.74754	0.586481			126.367	9.56582			192.69	14.5864			191.939	14.5296				217.616	1.93829			2854.15	25.4216			2665.96	23.7454			2655.28	23.6503				366.698	1.07915			3015.93	8.87557
										6.23917	0.472299			138.698	10.4993			352.078	26.6519			178.878	13.5409				113.129	1.00763			2216.32	19.7405			3173.6	28.2669			2316.88	20.6362				307.658	0.905405			2864.72	8.43057
	Average		1	13.8916	16.8396	14.1606	3.91147			11.3097	0.856133			132.462	10.0272			382.003	28.9172			204.677	15.4938				130.599	1.16323			2451.32	21.8336			2665.16	23.7383			2199.57	19.5913				342.156	1.00693			1396.88	4.11087
	SD		0	7.16401	6.87548	2.51943	0.876073			8.78772	0.665221			147.374	11.1561			180.93	13.6962			114.961	8.70243				110.326	0.982658			2938.61	26.1739			2547.53	22.6906			3222.49	28.7024				312.509	0.919681			1711.07	5.0355
										20.4717	1.54969			114.822	8.69194			430.219	32.5671			246.353	18.6487				81.278	0.723934			2440.21	21.7347			742.746	6.61556			2397.59	21.3551				263.042	0.774105			1817.37	5.34833
										13.0457	0.987546			139.995	10.5974			379.349	28.7163			207.939	15.7408				59.6087	0.530928			3257.86	29.0174			1958.95	17.4482			1665.33	14.8329				295.232	0.868837			1479.29	4.3534
										10.2177	0.773469			108.443	8.20899			254.365	19.2552			169.576	12.8367				112.489	1.00193			1920.93	17.1095			1959.36	17.4518			2178.18	19.4008				301.953	0.888616			1503.1	4.42347
										10.3659	0.784688			118.907	9.00116			395.637	29.9493			204.831	15.5055				69.1737	0.616123			1822.36	16.2316			2027.53	18.059			2253.89	20.0752				283.938	0.8356			1672.78	4.92282
										15.4654	1.17071			117.834	8.9199			208.3	15.7681			284.062	21.5032				115.322	1.02716			1413.82	12.5927			2653.75	23.6367			2718.07	24.2096				259.977	0.765085			1584.87	4.66411
										10.8823	0.823779			124.989	9.46152			325.74	24.6582			210.079	15.9028				110.894	0.987725			2494.81	22.221			1518.2	13.5224			1020.7	9.09127				275.383	0.810423			3102.31	9.12978
										19.8209	1.50042			124.951	9.45864			372.859	28.225			171.561	12.987				90.5907	0.806882			3813.19	33.9637			2272.41	20.2401			1046.52	9.32124				256.5	0.754853			3140.6	9.24246
										14.3202	1.08402			98.9024	7.48681			219.28	16.5993			150.149	11.3661				112.101	0.998472			2119.82	18.881			1876.14	16.7106			1728.76	15.3979				294.473	0.866603			2317.06	6.81887
										15.7326	1.19094			118.691	8.98475			101.11	7.65392			213.283	16.1453				212.459	1.89235			1967.38	17.5232			1594.88	14.2054			1793.41	15.9737				362.869	1.06789			2829.23	8.32613
										20.3614	1.54134			132.533	10.0326			403.044	30.51			250.159	18.9368				51.2975	0.456901			1919.06	17.0929			3055.6	27.2159			2219.89	19.7723				208.056	0.612287			2251.89	6.62708
										24.5462	1.85812			117.568	8.89981			351.11	26.5787			169.161	12.8053				110.007	0.979817			1185.46	10.5588			3190.04	28.4133			1927.21	17.1655				326.051	0.959534			2585.11	7.60771
										47.1311	3.56778			41.3258	3.12832			263.71	19.9626			248.051	18.7772				112.484	1.00188			1587.6	14.1406			3605.07	32.11			1859.5	16.5624				299.121	0.880282			2376.9	6.99497
										13.2408	1.00231			94.3156	7.13959			408.45	30.9192			177.341	13.4245				120.354	1.07198			1301.37	11.5912			1366	12.1668			990.988	8.82662				342.066	1.00666			2126.95	6.25939
										10.6959	0.809669			72.2844	5.47185			414.91	31.4083			229.394	17.3649				112.895	1.00554			1623.98	14.4646			1841.62	16.4031			997.134	8.88137				316.707	0.932036			2172.33	6.39294
										8.04526	0.609018			76.3388	5.77877			585.56	44.3263			204.016	15.4438				71.3801	0.635775			1384.22	12.3291			1499.74	13.358			1112.15	9.9058				392.728	1.15576			2265.44	6.66695
										10.1378	0.767421			57.3033	4.3378			295.33	22.3562			294.653	22.3049				55.0154	0.490016			1655.96	14.7495			896.848	7.98813			1970.47	17.5508				246.736	0.726118			2476.03	7.2867
										8.55572	0.647659			98.64	7.46695			357.053	27.0285			276.298	20.9155				60.2947	0.537038			1327.57	11.8245			886.937	7.89985			2439.99	21.7327				297.848	0.876536			2344.38	6.89927
										11.4427	0.866201			80.631	6.10368			436.191	33.0192			209.45	15.8551				78.9283	0.703006			1397.2	12.4447			1638.08	14.5902			3197.75	28.482				271.699	0.799582			2517.02	7.40733
										14.1435	1.07065			62.3627	4.72079			258.285	19.5519			96.1158	7.27587				99.1269	0.882913			586.68	5.2255			1713.96	15.2661			2912.55	25.9418				363.52	1.0698			1856.65	5.46393
										9.18185	0.695057			111.185	8.41656			313.954	23.766			214.413	16.2308				116.198	1.03496			2565.09	22.847			2375.08	21.1546			3088.03	27.5048				260.78	0.767448			2685.75	7.90388
										9.35183	0.707924			97.504	7.38095			122.91	9.30416			238.213	18.0325				99.6153	0.887262			2918.62	25.9958			2065.87	18.4005			3309.75	29.4796				256.668	0.755347			2551.92	7.51003
										7.22294	0.546769			117.72	8.91127			475.678	36.0083			264.382	20.0134				112.088	0.998354			3153.58	28.0886			2208.91	19.6745			2171.21	19.3387				444.201	1.30724			1979.45	5.82532
										12.7689	0.966592			88.3607	6.68881			482.182	36.5007			250.558	18.967				31.1562	0.277505			1377	12.2648			2325.49	20.7129			1577.66	14.052				496.612	1.46148			2632.91	7.74838
										7.75894	0.587344			75.8273	5.74005			189.5	14.345			214.331	16.2246				111.075	0.989333			2014.54	17.9433			1979.51	17.6313			1458.75	12.9929				496.656	1.46161			2406.76	7.08284
										10.1416	0.767709			125.769	9.52058			137.1	10.3783			204.609	15.4887				94.4459	0.84122			1715.28	15.2778			1151.6	10.2572			1434.75	12.7792				495.099	1.45702			2969.99	8.74037
										20.0182	1.51536			131.624	9.9638			215.929	16.3456			203.224	15.3838				86.2836	0.768519			1622.13	14.4481			1058.14	9.42474			1339.14	11.9276				491.933	1.44771			1816.5	5.34577
										12.5175	0.947562			64.8125	4.90624			380.633	28.8135			141.095	10.6807				84.2873	0.750738			1795.16	15.9893			1004.52	8.94715			1662.72	14.8097				446.838	1.315			1950.16	5.73912
										12.0757	0.914118			136.429	10.3275			320.807	24.2848			167.921	12.7114				66.5834	0.593051			1675.22	14.921			1727.57	15.3873			1843.65	16.4212				432.678	1.27333			1997.78	5.87926
										18.1135	1.37117			138.946	10.5181			244.788	18.5302			177.099	13.4062				215.029	1.91524			1996.25	17.7804			1450.59	12.9203			1635.29	14.5654				417.191	1.22775			2293.38	6.74918
										9.30554	0.70442			133.24	10.0862			476.627	36.0802			209.305	15.8442				112.916	1.00573			2456.54	21.8801			2084.95	18.5704			1651.18	14.7069				389.22	1.14543			2760.25	8.12313
										13.3906	1.01365			120.535	9.12437			201.63	15.2632			180.201	13.641				114.776	1.0223			2388.63	21.2753			1581.2	14.0836			487.813	4.3449			Average	339.801	1			2367.59	6.93717
										17.1706	1.2998			123.216	9.32732			130.77	9.89915			245.245	18.5648				122.884	1.09451			2731.17	24.3262			2315.7	20.6257			1727.68	15.3883			SD	77.3115	0.22752			525.533	1.54659
										11.8389	0.896192			47.9974	3.63335			439.32	33.2561			145.701	11.0294				112.022	0.997766			2697.42	24.0256			2021.49	18.0052			1692.09	15.0713
										8.03538	0.60827			43.4276	3.28742			555.133	42.023			255.082	19.3094				210.146	1.87175			1960.42	17.4613			550.905	4.90685			1722.77	15.3445
										13.672	1.03496			132.365	10.0199			280.418	21.2274			135.528	10.2593				101.737	0.906163			3129.84	27.8772			1284.67	11.4424			1227.22	10.9307
										8.36289	0.633062			130.445	9.87455			435.971	33.0026			128.855	9.75419				112.099	0.998453			2811.63	25.0429			2299.49	20.4813			1545.98	13.7699
										8.82613	0.668129			134.435	10.1766			492.252	37.263			202.353	15.3179				214.791	1.91312			2890.18	25.7425			2005.67	17.8643			754.959	6.72434
										10.7462	0.813476			141.626	10.7209			688.451	52.115			106.521	8.06353				201.004	1.79032			3260.93	29.0448			1695.35	15.1003			994.725	8.85991
										9.83561	0.744545			143.869	10.8907			576.793	43.6626			193.352	14.6365				99.681	0.887848			3244.61	28.8994			1857.15	16.5414			782.051	6.96564
										9.71802	0.735644			139.751	10.579			500.966	37.9226			279.649	21.1691				110.706	0.986047			2708.78	24.1268			1951.18	17.379			991.334	8.82971
										10.5852	0.801289			140.513	10.6367			404.192	30.5969			190.547	14.4242				101.548	0.904481			2626.48	23.3938			1354.57	12.065			1303.82	11.613
										6.32842	0.479055			77.3177	5.85287			485.215	36.7303			137.28	10.392				122.602	1.092			2561.33	22.8135			1567.93	13.9654			1351.94	12.0416
									Average	13.2102	1			108.424	8.20756			337.803	25.5713			200.86	15.2049				110.91	0.987863			2937.29	26.1621			1573.82	14.0178			1465.52	13.0532
									SD	6.74279	0.510422			31.4608	2.38155			175.584	13.2915			47.4794	3.59414			Average	112.273	1			2290.49	20.4012			2010.24	17.905			1795.22	15.9899
																										SD	45.3606	0.404022			695.108	6.19125			737.871	6.57214			683.977	6.09211
panel C: Relative plasmamembrane GFP fluorescence intensity
			No pre-treatment	ATP depletion	Ko143	ATP depletion + Ko143	Vi		2020-01-30																	2020-02-04																	2020-06-26
		2020-01-30	1	0.953	1.4007	1.0348				Plasmamembrane GFP fluorescence intensity	Relative plasmamembrane GFP fluorescence intensity			Plasmamembrane GFP fluorescence intensity	Relative plasmamembrane GFP fluorescence intensity			Plasmamembrane GFP fluorescence intensity	Relative plasmamembrane GFP fluorescence intensity			Plasmamembrane GFP fluorescence intensity	Relative plasmamembrane GFP fluorescence intensity				Plasmamembrane GFP fluorescence intensity	Relative plasmamembrane GFP fluorescence intensity			Plasmamembrane GFP fluorescence intensity	Relative plasmamembrane GFP fluorescence intensity			Plasmamembrane GFP fluorescence intensity	Relative plasmamembrane GFP fluorescence intensity			Plasmamembrane GFP fluorescence intensity	Relative plasmamembrane GFP fluorescence intensity				Plasmamembrane GFP fluorescence intensity	Relative plasmamembrane GFP fluorescence intensity			Plasmamembrane GFP fluorescence intensity	Relative plasmamembrane GFP fluorescence intensity
		2020-02-04	1	0.6317	0.646	0.9349
		2020-06-26	1	0.954	1.3781	1.225	1.3836		No pre-treatment	40.5208	1.03817		ATP depletion	64.1023	1.64234		Ko143	53.0094	1.35814		ATP depletion + Ko143	24.1502	0.618744			No pre-treatment	114.844	0.905868		ATP depletion	52.6885	0.415597		Ko143	26.9041	0.212215		ATP depletion + Ko143	134.693	1.06243			No pre-treatment	2404.98	1.7223		ATP depletion	2251.69	1.61252
		2020-07-03	1	0.915	1.4302		1.039			51.6244	1.32265			41.9308	1.07429			51.3291	1.31508			30.2182	0.77421				101.077	0.797277			73.4977	0.579736			32.8802	0.259353			81.6244	0.643838				2421.89	1.73441			2618.5	1.87521
		2020-07-17	1	0.7859	1.1931		0.9649			83.1255	2.12973			36.1436	0.926022			34.2989	0.87876			33.032	0.846301				263.886	2.08148			84.0935	0.663314			42.5484	0.335614			92.7834	0.731858				1757.8	1.25883			2095.52	1.50068
										45.0119	1.15323			80.0519	2.05098			36.028	0.923061			27.446	0.703184				246.066	1.94092			83.1212	0.655645			49.755	0.392458			95.4387	0.752803				1826.69	1.30816			2252.2	1.61289
	Average		1	0.84792	1.20962	1.0649	1.12917			26.7393	0.685078			24.4968	0.627624			36.4486	0.933837			22.9108	0.58699				132.511	1.04522			74.9751	0.59139			55.2312	0.435654			94.5569	0.745847				1770.36	1.26782			1433.2	1.02637
	SD		0	0.139097	0.328441	0.147374	0.223439			49.5322	1.26905			22.6846	0.581194			31.9346	0.818185			28.8254	0.738525				154.158	1.21597			78.2791	0.617451			83.5425	0.658968			90.7382	0.715726				2162.55	1.54869			1016.66	0.72807
										68.1708	1.74658			19.8065	0.507455			28.848	0.739104			27.7265	0.710371				84.1505	0.663764			43.9472	0.346647			40.937	0.322904			129.414	1.02079				1853.95	1.32769			631.965	0.452575
										17.3694	0.445015			33.4897	0.858028			32.5543	0.834062			31.0313	0.795042				53.1803	0.419476			96.8169	0.763674			31.7298	0.250279			94.6568	0.746635				917.688	0.657192			1244.43	0.891185
										34.8283	0.892324			17.2065	0.440842			25.9278	0.664287			42.3517	1.08508				93.3266	0.736143			49.3183	0.389014			80.1313	0.632061			127.697	1.00725				1116.47	0.799548			687.739	0.492517
										47.0691	1.20594			14.9544	0.383141			31.5577	0.808529			44.7937	1.14764				107.553	0.848358			99.2442	0.78282			66.3805	0.523597			48.6685	0.383888				894.542	0.640616			1767.51	1.26578
										33.6745	0.862762			31.8769	0.816707			29.5647	0.757467			20.6413	0.528843				126.151	0.995056			49.164	0.387797			37.6662	0.297104			74.4225	0.587031				967.219	0.692663			1636.35	1.17185
										41.4795	1.06273			29.5086	0.756029			29.1565	0.747008			24.0091	0.615129				89.5057	0.706005			43.9154	0.346397			50.6179	0.399265			82.2139	0.648488				996.245	0.71345			958.971	0.686757
										26.793	0.686454			42.5583	1.09037			25.3497	0.649476			22.346	0.572519				181.447	1.43122			61.2322	0.482988			48.4637	0.382273			136.128	1.07375				1129.49	0.808872			1059.8	0.758964
										37.3033	0.955735			40.8114	1.04561			35.4366	0.907909			20.0908	0.514739				61.2661	0.483256			86.2957	0.680685			42.1126	0.332176			86.1544	0.67957				1827.73	1.30891			704.876	0.504789
										39.7723	1.01899			30.4297	0.779629			24.1746	0.619369			51.3984	1.31686				66.6671	0.525858			67.8911	0.535513			46.6327	0.36783			73.1662	0.577122				2769.65	1.98345			1853.49	1.32736
										35.0406	0.897763			18.4724	0.473275			283.24	7.25679			30.9864	0.793892				134.394	1.06008			62.4964	0.49296			57.1388	0.4507			142.281	1.12229				968.298	0.693436			2447.58	1.75281
										34.5249	0.88455			17.1343	0.438992			76.6545	1.96394			38.9314	0.997448				126.979	1.00159			63.5324	0.501132			59.3945	0.468493			153.76	1.21283				734.66	0.526119			1155.04	0.827169
										30.368	0.778048			28.8523	0.739215			55.0214	1.40968			37.7357	0.966813				103.309	0.814882			48.3077	0.381042			48.7623	0.384628			235.775	1.85975				1135.52	0.81319			1045.39	0.748645
										29.0106	0.74327			28.9178	0.740893			18.027	0.461863			38.5668	0.988106				34.8692	0.275042			126.12	0.994811			53.0885	0.418752			210.151	1.65763				1428.69	1.02314			709.352	0.507995
										43.0629	1.1033			41.7358	1.0693			89.759	2.29968			21.7223	0.556539				77.0726	0.607935			53.3122	0.420517			73.2505	0.577787			197.084	1.55456				1708.62	1.22361			2148.57	1.53867
										28.7624	0.736911			20.5865	0.527439			60.2316	1.54317			62.5594	1.60281				94.7147	0.747092			47.4812	0.374523			200.532	1.58176			120.466	0.950214				1936.91	1.3871			1047.55	0.750191
										32.675	0.837155			20.6498	0.529061			89.1691	2.28457			50.2568	1.28761				56.7581	0.447697			131.579	1.03787			172.403	1.35988			84.7411	0.668422				1950.06	1.39651			1552.69	1.11194
										24.2765	0.62198			18.7993	0.48165			44.5296	1.14088			107.246	2.74771				65.6636	0.517942			187.078	1.47564			138.79	1.09475			75.641	0.596642				1397.47	1.00078			1698.5	1.21636
										24.2765	0.62198			24.781	0.634905			41.2681	1.05732			46.175	1.18303				114.544	0.903502			121.537	0.958662			159.545	1.25846			92.109	0.726539				1302.95	0.933093			556.773	0.398727
										35.7239	0.915269			49.5866	1.27044			56.8296	1.45601			65.264	1.67211				66.7451	0.526473			44.4898	0.350927			175.718	1.38603			80.9564	0.638569				1633.61	1.16989			654.171	0.468477
										17.192	0.44047			37.472	0.960057			66.9243	1.71464			101.124	2.59086				93.1388	0.734662			64.9856	0.512594			139.619	1.10129			133.73	1.05484				1738.42	1.24495			698.466	0.500199
										67.8361	1.738			58.8279	1.50721			82.434	2.11201			119.563	3.06328				124.362	0.980945			80.9445	0.638475			228.749	1.80433			45.6179	0.359826				1924.52	1.37822			631.566	0.452289
										100.418	2.57277			14.793	0.379006			48.9012	1.25288			56.2896	1.44218				157.562	1.24282			114.34	0.901893			72.6167	0.572787			90.6219	0.714809				1296.91	0.928768			694.423	0.497303
										24.48	0.627193			33.9892	0.870825			62.1274	1.59174			43.9941	1.12716				237.042	1.86974			56.7994	0.448023			39.3745	0.310579			153.804	1.21318				1633.56	1.16986			1934.16	1.38513
										54.3283	1.39193			12.1541	0.311396			28.4461	0.728807			33.4833	0.857864				152.403	1.20213			54.7476	0.431839			91.944	0.725237			102.35	0.807318				727.908	0.521283			719.355	0.515158
										48.9385	1.25384			32.8394	0.841367			41.154	1.05439			47.8831	1.2268				272.992	2.15331			62.188	0.490528			178.078	1.40465			182.254	1.43759				1531.81	1.09699			2721.45	1.94894
										62.4641	1.60037			29.8779	0.765491			35.5423	0.910617			23.7938	0.609613				145.861	1.15052			108.928	0.859204			138.424	1.09186			278.807	2.19918				731.234	0.523665			874.467	0.62624
										44.3896	1.13729			27.0943	0.694173			24.8062	0.635551			47.9518	1.22856				193.703	1.52789			88.6575	0.699314			49.4852	0.39033			139.09	1.09712				784.139	0.561553			677.414	0.485123
										49.0405	1.25645			29.8523	0.764835			72.4783	1.85694			35.4798	0.909015				103.297	0.814788			90.0576	0.710358			85.7812	0.676626			85.5886	0.675107				823.54	0.589769			1350.04	0.966816
										16.4362	0.421106			88.6992	2.27253			124.546	3.19095			66.0236	1.69157				74.0116	0.58379			57.127	0.450607			143.45	1.13151			107.799	0.850299				835.505	0.598338			1136.86	0.81415
										48.1818	1.23445			31.5265	0.807729			111.051	2.8452			64.2704	1.64665				81.3007	0.641285			92.773	0.731776			157.14	1.23949			56.9425	0.449152				816.846	0.584975			2074.08	1.48533
										17.8634	0.457672			46.2228	1.18426			26.1456	0.669867			42.9363	1.10006				47.8786	0.377658			88.8226	0.700616			94.1265	0.742453			78.7874	0.621461				1019.25	0.729925			1243.34	0.890404
										24.0166	0.615321			18.221	0.466834			18.5285	0.474712			26.104	0.668801				177.769	1.40221			131.135	1.03437			52.3731	0.413109			66.8909	0.527623				740.662	0.530417			987.348	0.707078
										25.7851	0.660631			17.8704	0.457851			117.835	3.01901			30.0471	0.769826				247.245	1.95022			107.819	0.850454			49.337	0.389161			120.484	0.950356				840.353	0.60181			982.172	0.703372
										29.2214	0.748671			17.889	0.458328			57.4829	1.47275			21.5112	0.551131				168.225	1.32693			54.9648	0.433552			35.7009	0.281602			205.453	1.62058			Average	1396.38	1			1332.15	0.954001
										48.5834	1.24474			23.4701	0.601319			93.0395	2.38373			31.5705	0.808857				192.157	1.5157			95.2328	0.751179			74.0817	0.584343			151.5	1.195			SD	548.292	0.392653			634.4	0.454319
										38.9462	0.997827			60.5753	1.55198			66.0979	1.69347			25.2909	0.647969				172.076	1.3573			72.7202	0.573604			114.823	0.905703			207.637	1.6378
										45.6343	1.16918			33.019	0.845968			75.5205	1.93488			23.8719	0.611614				97.7396	0.770952			80.9272	0.638339			63.0436	0.497276			109.56	0.864189
										38.9114	0.996935			67.9199	1.74015			59.4038	1.52196			21.4071	0.548464				108.664	0.857122			93.152	0.734766			115.751	0.913023			61.384	0.484186
										24.3912	0.624918			75.9466	1.9458			61.4996	1.57566			21.4071	0.548464				76.9129	0.606675			55.9063	0.440979			60.3751	0.476228			80.7614	0.637031
										22.1846	0.568384			47.1553	1.20815			38.5696	0.988178			52.7135	1.35055				185.815	1.46567			45.1454	0.356099			52.4686	0.413863			104.358	0.823157
										21.6634	0.55503			54.9465	1.40776			32.8907	0.842681			31.5293	0.807801				225.644	1.77984			57.3701	0.452525			76.1043	0.600297			133.069	1.04962
										24.3411	0.623635			73.3293	1.87874			24.8011	0.63542			55.4892	1.42167				114.879	0.906144			108.956	0.859425			78.237	0.617119			143.706	1.13353
										47.3456	1.21302			48.2376	1.23588			37.5993	0.963318			25.6699	0.657679				105.715	0.833861			90.2765	0.712084			39.632	0.31261			112.057	0.883885
										52.3549	1.34137			53.6092	1.3735			27.6306	0.707914			22.8921	0.58651				90.3721	0.712839			108.274	0.854045			70.0826	0.552799			150.52	1.18728
										34.8988	0.89413			61.9557	1.58735			32.5005	0.832684			37.1564	0.951971				110.02	0.867818			91.0311	0.718037			42.334	0.333923			132.309	1.04363
									Average	39.031	1			37.1973	0.953018			54.6726	1.40075			40.3896	1.03481				84.8214	0.669056			81.2248	0.640686			41.4603	0.327031			93.4997	0.737508
									SD	16.7699	0.429657			19.0155	0.487189			41.7786	1.0704			21.8414	0.55959				126.778	1			80.0946	0.631772			81.899	0.646004			118.537	0.934995
																											59.3002	0.467749			28.8484	0.227551			49.8457	0.393174			49.1579	0.387749
panel D: Pearson's correlation coeffitient
		No pre-treatment	ATP depletion	Ko143	ATP depletion + Ko143	Vi
		0.6803	0.7915	0.0232	-0.1252	0.0138
		0.3455	0.7653	-0.1642	0.0798	0.0888
		0.2481	0.7865	-0.053	-0.3739	0.016
		0.1086	0.5975	-0.0939	-0.2071	0.139
		0.2686	0.5647	0.179	0.1033	0.1327
		0.6871	0.5312	-0.3568	-0.3667	0.3378
		0.5198	0.7011	0.1255	0.0341	0.2298
		0.1236	0.5517	-0.3736	0.0207	0.1131
		0.6607	0.7615	-0.0249	-0.1275	0.0891
		0.3962	0.6133	0.1161	-0.1212	0.1779
		0.3648	0.6975	-0.1031	-0.0869	0.4077
		0.3744	0.5379	-0.1196	-0.077	0.1955
		0.243	0.6653	0.0119	-0.1303	0.4025
		0.2765	0.6548	0.0824	0.1302	0.0722
		0.4154	0.7105	0.1842	0.186	0.3343
		0.2139	0.6554	-0.1503	0.12	0.3615
		0.6683	0.7114	-0.1163	-0.055	0.3918
		0.4824	0.5213	-0.0627	0.0936	0.4401
		0.4235	0.6529	0.1576	0.0776	0.3548
		0.2046	0.5931	0.02	0.1032	0.2642
		0.2287	0.7009	0.1169	-0.1123	0.0249
		0.3484	0.6552	0.1935	-0.1566	0.3494
		0.2713	0.6633	0.0208	-0.0887	0.4333
		0.2533	0.5005	0.1078	0.1885	0.0458
		0.4691	0.6624	-0.0778	0.0427	0.3326
		0.259	0.5751	-0.3571	0.1214	0.2362
		0.3259	0.5859	-0.0971	-0.2347	0.3793
		0.2118	0.5494	-0.0052659	0.0916	0.0192
		0.2272	0.5165	-0.0269	-0.122	0.3627
		0.1605	0.7445	-0.1813	0.0432	0.342
		0.1904	0.5627	-0.0948	0.2336	0.2449
		0.1586	0.6735	-0.2985	0.0968	0.3293
		0.1436	0.7518	-0.0378	0.2593	0.1305
		0.4776	0.5552	0.0967	0.0075794	-0.25
		0.2371	0.5974	-0.0376	0.1538	-0.1132
		0.3312	0.5711	-0.2034	0.1487	0.0185
		0.4279	0.6579	-0.0232	0.0441	-0.3658
		0.2361	0.5932	0.2069	0.0477	-0.0291
		0.3857	0.6917	0.0095893	-0.1038	0.259
		0.2097	0.7508	0.0193	-0.0554	0.2191
		0.3705	0.7668	-0.1126	-0.1249	0.1773
		0.1395	0.5769	-0.1206	0.0759	0.2277
		0.1364	0.8333	-0.1098	-0.1679	0.2634
		0.2026	0.5206	0.1172	-0.005353	0.2829
		0.2683	0.5527	0.0523	-0.2396	0.2811
		0.2052	0.5902	-0.2313	0.1366	0.1686
		0.3644	0.5186	-0.1044	0.0864	0.2704
		0.1441	0.5722	-0.252	-0.2096	0.3348
		0.1551	0.6159	-0.0797	0.1362	0.258
		0.2867	0.6234	0.0754	0.065	0.2499
		0.2179	0.6244	-0.0374	0.0145	0.2858
		0.448	0.5642	-0.1523	0.1085	0.1766
		0.3785	0.6048	0.1809	0.0739	0.1362
		0.4819	0.6127	-0.1199	-0.181	0.2409
		0.4415	0.5938	-0.1386	0.0577	0.3555
		0.3124	0.4831	-0.0631	-0.0031851	0.3054
		0.3536	0.4919	-0.0598	0.1033	0.3583
		0.2424	0.6796	0.1441	-0.1101	0.3453
		0.2943	0.5579	-0.038	-0.0096977	0.1714
		0.6169	0.4788	-0.0676	-0.5449	0.2588
		0.3137	0.4853	0.1392	0.0667	0.3529
		0.3868	0.6381	0.1141	-0.1664	0.0939
		0.2567	0.6138	-0.0196	0.151	0.1548
		0.1135	0.4829	-0.1677	0.0167	0.2195
		0.1309	0.6207	0.0417	0.0817	0.1636
		0.1965	0.6794	0.00026562	0.0215	0.1349
		0.5356	0.4952	-0.1845	-0.3779	0.2511
		0.1463	0.5255	-0.2315	0.0025386	0.1067
		0.2655	0.6623	-0.2675	-0.2734	0.2101
		0.152	0.5628	-0.1806	0.1071	0.2512
		0.3469	0.5742	-0.0304	0.012	0.1906
		0.2493	0.7023	0.1591	-0.003745	0.0669
		0.3565	0.6577	0.1016	0.1461	0.0947
		0.5256	0.5741	-0.0104	0.0413	0.215
		0.2404	0.5429	-0.4431	-0.1254	0.1921
		0.2288	0.6203	0.039	0.082	0.2447
		0.3792	0.52	-0.0405	0.0739	0.2298
		0.1099	0.5453	0.1083	0.1814	0.2697
		0.1415	0.5713	0.0243	0.0329	0.0349
		0.2607	0.5569	-0.1277	-0.2493	0.2796
		0.3812	0.743	0.0917	-0.0797	0.2038
		0.1508	0.6561	-0.2606	-0.0253	0.2369
		0.4681	0.5715	-0.0584	0.0564	0.1427
		0.3303	0.7317	-0.7877	-0.3891	0.1584
		0.2613	0.5884	-0.0453	0.0391	0.2513
		0.2434	0.6721	-0.082	-0.1954	0.1942
		0.3171	0.5709	0.1426	-0.0788	0.1419
		0.3085	0.6065	-0.1981	0.1329	0.242
		0.1709	0.6936	-0.0483	-0.1628	0.073
		0.3117	0.6675	0.0070023	-0.1084	0.0104
		0.1666	0.6161	-0.1052	0.146	0.0491
		0.2343	0.6392	-0.3569	0.0704	0.0488
		0.2937	0.5679	-0.4471	-0.2308	0.266
		0.2855	0.6152	0.1168	0.0904	0.2353
		0.353	0.6354	-0.235	-0.4056	0.0071379
		0.1562	0.6251	-0.0084594	0.1064	0.1853
		0.2072	0.6376	-0.0289	0.0497	0.1661
		0.2955	0.6207	-0.4684	0.1266	0.2449
		0.2107	0.6462	-0.3796	0.107	0.1147
		0.1612	0.6562	0.0199	0.0987	0.246
		0.3397	0.6426	-0.2165	-0.0115	0.0747
		0.2077	0.7509	0.0941	-0.2337	0.272
		0.3927	0.5867	-0.2114	0.1551	0.2246
		0.2516	0.8025	0.0622	0.0886	0.1362
		0.3872	0.6644	-0.0413	-0.0057434	0.2555
		0.2817	0.6637	0.0916	-0.0869	0.2503
		0.239	0.7126	-0.2399	0.013	0.1606
		0.1579	0.5018	0.0313	-0.0763	0.0435
		0.1865	0.6198	-0.5226	0.165	0.077
		0.3412	0.5111	-0.2786	-0.098	0.1323
		0.4616	0.7015	0.0559	0.0112	0.2779
		0.6687	0.6386	-0.0573	0.0606	0.0281
		0.4062	0.6064	-0.3241	-0.1412	0.0425
		0.4848	0.7726	-0.4224	-0.0555	0.0708
		0.2953	0.5754	-0.2706	-0.3964	0.0202
		0.2021	0.5723	-0.4568	-0.0804	0.126
		0.123	0.6344	-0.0708	0.1383	0.1393
		0.1024	0.6596	-0.3997	-0.3426	0.0831
		0.2585	0.7412	0.0611	-0.1126	0.2007
		0.4884	0.6164	-0.1145	-0.1397
		0.1194	0.6269	-0.025	0.0417
		0.1238	0.8862	-0.3103	-0.2562
		0.3993	0.7708	0.0422	0.1032
		0.1293	0.914	-0.2047	-0.1238
		0.5319	0.8989	0.1576	-0.1337
		0.2365	0.7092	-0.2465	-0.1219
		0.4009	0.8036	-0.0827	-0.2915
		0.2623	0.7901	-0.087	-0.7142
		0.4359	0.5744	-0.4726	0.0854
		0.3921	0.8658	-0.3673	0.1972
		0.3783	0.6119	-0.0576	-0.0506
		0.4425	0.9215	-0.1764	-0.0905
		0.3191	0.8245	-0.697	0.0927
		0.3628	0.7167	-0.0476	0.0195
		0.1456	0.6994	0.1041	0.0544
		0.2751	0.8043	-0.3792	-0.1346
		0.3608	0.7744	0.0858	0.0203
		0.3472	0.8575	-0.1192	-0.6934
		0.3568	0.8205	-0.2094	0.1124
		0.2466	0.6857	-0.3457	-0.1814
		0.3073	0.8434	-0.142	-0.065
		0.1267	0.7407	-0.1092	-0.0198
		0.3135	0.8988	0.0639	0.0725
		0.4026	0.611	0.0037181	0.0534
		0.1244	0.7281	0.0321	-0.0303
		0.2669	0.818	-0.097	-0.376
		0.3543	0.7497	-0.3531	0.1388
		0.3864	0.7901	-0.3465	-0.1405
		0.323	0.6873	0.0462	-0.1619
		0.3282	0.8302	0.1091	0.0126
		0.2013	0.7611	-0.4076	-0.0074451
		0.1792	0.7725	-0.0915	-0.0897
		0.389	0.777	-0.0922	-0.4438
		0.4059	0.7417	-0.1781	-0.1057
		0.1648	0.7576	-0.2487	-0.3262
		0.3345	0.8724	-0.1653	-0.0010812
		0.223	0.7362	0.0374	-0.0035165
		0.4099	0.8226	-0.4899	0.1766
		0.3212		-0.3891	-0.4056
		0.1092		-0.26	-0.5113
	Average	0.301099	0.66042	-0.102247	-0.0445897	0.187138
	SD	0.129144	0.103921	0.185179	0.176821	0.130964
