# Supplementary material for: Nucleotide binding is the critical regulator of ABCG2 conformational transitions
Source: eLife. 2023 Feb 10;12:e83976. doi: 10.7554/eLife.83976 (PMC9917445; doi:10.7554/eLife.83976)
Supplement: Figure 7—source data 1. [file elife-83976-fig7-data1.xlsx]

## Sheet: Figure 7
Figure 7
panel B: D values (µm2/s)		No pre-treatment	No pre-treatment	Ko143	ATP depletion
		0.178	10.0927	3.1716	0.0573
		0.3039	9.3461	8.6182	0.0576
		0.7218	11.8592	7.8917	0.3085
		0.3588	16.1274	11.2959	0.5325
		0.6368	9.6438	13.7294	0.0819
		0.3057	14.227	16.0102	0.1244
		0.2238	10.8812	6.1271	0.079
		0.0997	17.8569	2.4427	0.144
		0.2646	4.7421	5.5535	0.2298
		0.1729	10.1338	16.5916	0.7927
		0.1469	15.7483		0.1592
		0.1249	5.5507		0.6839
		0.1347	3.2809		0.2328
		0.142	7.8468		0.3614
		0.2254	6.6746		0.2076
		0.3751	2.6544
		0.4676
		0.1254
		0.1494
		0.0948
		0.5278
		0.1215
	Average	0.26825	9.79162	9.14319	0.270173
	SD	0.179365	4.59381	5.08465	0.230176
