# Supplementary material for: Nucleotide binding is the critical regulator of ABCG2 conformational transitions
Source: eLife. 2023 Feb 10;12:e83976. doi: 10.7554/eLife.83976 (PMC9917445; doi:10.7554/eLife.83976)
Supplement: Figure 8—source data 1. [file elife-83976-fig8-data1.xlsx]

## Sheet: Figure 8
Figure 8
panel B: Pearson's correlation coefficient				No pre-treatment	AMP-PNP/Mg2+
				0.8263	-0.0315
				0.8138	-0.0327
				0.8102	0.071
				0.8287	0.0772
				0.8551	0.0895
				0.8804	-0.3352
				0.909	0.0021555
				0.8827	0.0283
				0.8708	-0.2427
				0.8138	0.0213
				0.8726	-0.6002
				0.816	-0.2515
				0.9106	-0.1289
				0.7741	-0.188
				0.8792	-0.4941
				0.8409	-0.0794
				0.8553	-0.0806
				0.8631	-0.4354
				0.9337	-0.1672
				0.8226	-0.0388
				0.9399	-0.6083
				0.9428	-0.3238
				0.8486	-0.049
				0.7746	-0.3643
				0.8715	-0.1622
				0.8307	-0.4924
				0.9508	-0.4121
				0.8615	0.0523
				0.861	-0.0173
				0.8493	-0.0157
				0.8329	-0.3474
				0.8535	0.0449
				0.798	0.0868
				0.8155	0.0586
				0.8714	-0.3101
				0.8385	-0.2685
				0.8193	-0.3761
				0.967	-0.2835
				0.8314	-0.3434
				0.8331	-0.5359
				0.7719	-0.3039
				0.8369	-0.7792
				0.8034	-0.2142
				0.782	-0.1148
				0.7713	-0.0217
				0.8502	0.0732
				0.8118	-0.0645
				0.9038	-0.389
				0.7723	-0.4711
				0.752	-0.0687
				0.9241	0.0239
				0.8577	0.0643
				0.8429	0.0293
				0.9507	-0.2224
				0.8437	-0.0641
				0.7446	-0.0011516
				0.806	-0.6731
				0.8386	-0.2516
				0.8963	0.0368
				0.8236	0.0509
				0.8913	-0.0013902
				0.8067	-0.1813
				0.9064	0.049
				0.95	-0.4866
				0.7429	-0.0797
				0.9239	0.00091141
				0.7841	0.0065066
				0.8166	0.0985
				0.8428	-0.0054137
				0.835	0.0378
				0.8674	-0.0179
				0.9251	-0.0484
				0.7588	-0.3092
				0.8445	-0.0196
				0.8308	-0.5953
				0.8353	-0.2218
				0.908	0.0884
				0.727	0.0571
				0.886	-0.615
				0.892	-0.4009
				0.8435	0.0929
				0.8026	-0.0549
				0.946	-0.1449
				0.8484	-0.1244
				0.8416	-0.0717
				0.8956	-0.0654
				0.8652	0.0391
				0.8614	-0.227
				0.9028	-0.0876
				0.8702	-0.0146
				0.8453	-0.0508
				0.9205	-0.0299
				0.8602	-0.1283
				0.9208	0.09
				0.883	-0.4716
				0.8854	-0.0433
				0.8273	-0.3789
				0.8785	0.0010374
				0.8504	-0.0393
				0.8051	0.0724
				0.931	-0.2311
				0.9301	0.0709
				0.8431	-0.036
				0.8238	-0.0472
				0.8459	0.0004072
				0.9243	0.0048683
				0.8568	-0.1472
				0.875	-0.6217
				0.8326	-0.0525
				0.8722	0.0389
				0.8377	-0.0066038
				0.8425	-0.2238
				0.8847	-0.0976
				0.8656	0.0618
				0.86	-0.2551
				0.8242	0.0735
				0.882	-0.2621
				0.9231	0.1813
				0.8759	0.1146
				0.8925	0.1352
				0.8647	0.0898
				0.7853	-0.0546
				0.8097	-0.2863
				0.7681	-0.2114
				0.752	0.1206
				0.7142	-0.1412
				0.7233	0.0526
				0.7333	-0.2158
				0.8777	-0.0464
				0.8623	0.0236
				0.8307	-0.2725
				0.7247	-0.1126
				0.9698	-0.4182
				0.844	-0.0119
				0.8142	0.1519
				0.8108	-0.0671
				0.8735	-0.0211
				0.8289	-0.3902
				0.8371	0.0699
				0.9046	0.0229
				0.829	-0.4091
				0.8216	0.1503
				0.8724	-0.0823
				0.7325	0.0513
				0.7348	0.0497
				0.7265	0.0691
				0.726	-0.2293
				0.7705	0.1568
				0.8135	0.1087
				0.9138	0.0064921
				0.8174	0.0733
				0.9346	0.0026302
				0.8928	-0.0439
				0.8968	-0.2284
				0.8404	0.0965
				0.8804	-0.0633
			Average	0.846906	-0.118177
			SD	0.056137	0.20189
