# Supplementary material for: Nucleotide binding is the critical regulator of ABCG2 conformational transitions
Source: eLife. 2023 Feb 10;12:e83976. doi: 10.7554/eLife.83976 (PMC9917445; doi:10.7554/eLife.83976)
Supplement: Table 1—source data 1. [file elife-83976-table1-data1.xlsx]

## Sheet: Table 1
Table 1
Apparent nucleotide affinities (KA)
			ATP/Mg2+	ATP/Mg2+ + Vi	ATP/Mg2+ + BeFx		ATP(Mgfree)	ATP(Mgfree)+ Vi	ATP(Mgfree)+ BeFx		ATP/Mg2+ at 4°C	ATP/Mg2+ + Vi at 4°C	ATP/Mg2+ + BeFx at 4°C		ADP/Mg2+	ADP/Mg2+ + Vi	ADP/Mg2+ + BeFx		AMP-PNP/Mg2+	AMP-PNP/Mg2+ + Vi	AMP-PNP/Mg2+ + BeFx
			6.5785	0.0048			4.49	4.21			4.51	4.11			4.321	0.5616			5.4537	4.91	5.8811
			3.466	0.1666			4.1	3.99			4.05	3.75			5.2619	0.4246			5.14
			4.5546	0.2393			3.36	3.41			4.57	4.18			9.1348	0.3459
			5.4985	0.1452			3.68	3.49			4.46		3.7		9.3849		0.4812
			4.45	0.3623			3.68		3.33		4.6		4.59		9.6413		0.2972
			4.03	0.1081			3.57		3.03		4.11		3.9		6.5126		0.9354
			3.14	0.41			2.95		3.25
			3.38	0.61
			4.1	0.88	0.34
			3.4	0.35	0.41
			3.1	0.5	0.46
		Average	4.15433	0.3433	0.403333		3.69	3.775	3.20333		4.38333	4.01333	4.06333		7.37608	0.444033	0.571267		5.29685
		SD	1.08316	0.252937	0.0602771		0.496521	0.387255	0.155349		0.240638	0.230723	0.46694		2.31554	0.109155	0.328495		0.221819
